# Supplementary material for: PAX8 activates metabolic genes via enhancer elements in Renal Cell Carcinoma
Source: PubMed Central journal article supplement (PMC6702156; doi:10.1038/s41467-019-11672-1), 2019-08-20
Supplement: 41467_2019_11672_MOESM3_ESM.pdf [file 41467_2019_11672_MOESM3_ESM.pdf]

# Supplementary Data 1

| Gene_symbol | log2FoldChange | Adj.pvalue |
|-------------|----------------|------------|
| ALDH3B1     | 1.288805032    | 2.70E-160  |
| UBE2V2      | -1.360706772   | 9.80E-108  |
| RPA3        | -1.816459127   | 1.10E-106  |
| METAP1      | -1.670784622   | 6.20E-103  |
| CP          | -1.71601299    | 1.30E-92   |
| ATP2B4      | 1.922504125    | 4.00E-86   |
| PCDH7       | 2.900734446    | 1.30E-84   |
| SMPD1       | 1.499942434    | 1.30E-82   |
| SMC2        | -0.965688892   | 5.70E-76   |
| EI24        | -1.717512825   | 2.40E-72   |
| CPA4        | 3.48729031     | 1.70E-70   |
| PRDM1       | 3.410670593    | 2.00E-66   |
| MAT2B       | -1.504363392   | 1.60E-65   |
| GBP2        | 1.613546438    | 2.80E-62   |
| HMGB1       | -0.991865836   | 1.20E-60   |
| TMEM97      | -1.269593272   | 1.20E-55   |
| MCTP1       | -1.164857915   | 1.20E-54   |
| ADAM19      | 1.521452269    | 2.20E-54   |
| HDGF        | -0.809737942   | 1.90E-53   |
| GPR180      | -1.335652361   | 2.80E-53   |
| MAD2L1      | -1.51247515    | 3.20E-52   |
| SPOCD1      | 2.416377212    | 3.70E-50   |
| HIST1H3A    | -1.311825036   | 1.00E-48   |
| P3H4        | 1.583338865    | 7.20E-48   |
| TOM1L2      | 1.164973754    | 1.30E-47   |
| LPCAT2      | 1.035096223    | 1.40E-46   |
| KAZN        | -1.0751906     | 2.90E-46   |
| HDAC5       | 1.692568076    | 5.10E-46   |
| GAS2L3      | -1.144659556   | 7.70E-46   |
| GNPNAT1     | -1.061159574   | 9.00E-45   |
| BMF         | 2.138282907    | 1.40E-43   |
| KHDRBS3     | -1.160734314   | 3.30E-43   |
| POLD4       | 1.078760813    | 1.40E-42   |
| SSX2IP      | -1.086012186   | 2.60E-42   |
| CLU         | 1.879343805    | 3.10E-42   |
| LURAP1L     | 2.095003076    | 8.30E-42   |
| SUMF1       | -1.428127588   | 9.50E-42   |
| FAM214B     | 1.36617429     | 1.60E-41   |
| TFDP1       | -0.741277405   | 5.20E-41   |
| SEZ6L2      | 1.361880766    | 9.80E-41   |
| ITGA5       | 1.160316102    | 2.00E-40   |
| TGFBR2      | 1.113545626    | 5.50E-40   |
| RBFOX2      | 0.694418499    | 7.30E-40   |
| SFXN3       | 0.703256048    | 1.50E-39   |
| ESCO2       | -1.153448567   | 2.00E-39   |
| LPXN        | -1.291910036   | 3.50E-39   |
| ANKS6       | -0.940476299   | 2.20E-38   |
| GSN         | 1.427840552    | 9.10E-38   |
| THOP1       | -1.371812577   | 1.30E-37   |

|              |              |          |
|--------------|--------------|----------|
| DDAH1        | -1.42940679  | 1.70E-37 |
| H2AFZ        | -0.842014538 | 3.20E-37 |
| ROBO1        | 0.988869487  | 4.30E-37 |
| CAPN5        | 1.822202506  | 7.40E-37 |
| TFAM         | -0.942513523 | 1.80E-36 |
| HAUS6        | -0.792589874 | 2.10E-36 |
| FAR1         | -1.156923934 | 2.20E-36 |
| FAM171A1     | -1.521394767 | 4.10E-36 |
| HIST1H2BC    | -0.861779355 | 1.30E-35 |
| RASA4        | 1.457056007  | 1.50E-35 |
| GPRIN1       | -0.930269631 | 2.00E-35 |
| PTMA         | -1.206886165 | 2.30E-35 |
| MCM2         | -0.976500676 | 1.30E-34 |
| UBE2D3       | -0.702847219 | 3.00E-34 |
| C1QTNF6      | 1.507640018  | 6.30E-34 |
| HIST1H4D     | -1.317982897 | 8.70E-33 |
| MEF2D        | 0.874993036  | 7.40E-32 |
| TMEM14A      | -1.02535763  | 7.90E-32 |
| RNF138       | -0.962900934 | 8.10E-31 |
| POLA1        | -0.897306125 | 8.50E-31 |
| CHAF1B       | -0.744156742 | 9.50E-31 |
| GMNN         | -0.917186722 | 1.10E-30 |
| ORAI3        | 1.137739666  | 1.50E-30 |
| MRPL11       | -0.963004276 | 1.90E-30 |
| RNF144B      | -1.362055844 | 2.90E-30 |
| HIST1H2AB    | -1.17691387  | 3.70E-30 |
| KIAA0101     | -1.062337385 | 4.00E-30 |
| LAMB2        | 1.234841812  | 9.90E-30 |
| COQ10B       | 0.666139764  | 1.10E-29 |
| TBL1XR1      | -0.940252953 | 1.80E-29 |
| CALB2        | 2.298256509  | 2.50E-29 |
| CX3CL1       | 1.080815299  | 7.40E-29 |
| BRI3BP       | -0.985032209 | 1.30E-28 |
| SSBP2        | 1.033177126  | 1.40E-28 |
| BMP1         | 1.304989316  | 1.90E-28 |
| PAX8         | -1.473591199 | 2.10E-28 |
| RP1-34B20.21 | -1.129435119 | 4.00E-28 |
| CIDEC        | 2.621117859  | 5.10E-28 |
| VGLL4        | 0.720799792  | 9.70E-28 |
| GRPEL2       | -0.717033271 | 1.20E-27 |
| HNRNPLL      | 1.017664088  | 1.20E-27 |
| HIST1H2BD    | -0.941185552 | 1.40E-27 |
| NEMP1        | -0.884383675 | 1.80E-27 |
| DST          | 1.150740572  | 3.60E-27 |
| RABEP1       | -0.810196878 | 7.20E-27 |
| SAE1         | -0.695650968 | 7.50E-27 |
| AKR1C1       | 2.145228053  | 8.50E-27 |
| WDR76        | -1.017491069 | 1.10E-26 |
| FIGNL1       | -1.067895864 | 1.70E-26 |
| SHMT1        | -0.889601216 | 1.70E-26 |
| CD3EAP       | -1.056108587 | 2.10E-26 |
| CA2          | -1.428149686 | 2.90E-26 |
| SLCO2B1      | 1.661110802  | 3.70E-26 |
| SPC25        | -1.128972282 | 4.00E-26 |
| ANAPC1       | -0.71932613  | 4.50E-26 |

|           |              |          |
|-----------|--------------|----------|
| SEMA3B    | 2.066200879  | 4.50E-26 |
| MSH2      | -0.680227526 | 5.50E-26 |
| GIN52     | -1.172437506 | 5.70E-26 |
| CREB5     | -1.004148235 | 8.30E-26 |
| MMS22L    | -0.789571662 | 8.40E-26 |
| EFHB      | -1.817885223 | 8.70E-26 |
| IFITM10   | 2.060162017  | 9.30E-26 |
| PFAS      | -0.930914044 | 9.70E-26 |
| OAS3      | -1.122399992 | 1.10E-25 |
| TYMS      | -1.05685565  | 1.10E-25 |
| PCDH20    | -2.092893457 | 1.60E-25 |
| ZNF467    | 2.083574534  | 2.10E-25 |
| GTPBP3    | -0.948961753 | 2.40E-25 |
| MCM10     | -1.24392899  | 2.70E-25 |
| PBX2      | 0.773258918  | 2.80E-25 |
| POLD3     | -0.940421126 | 3.10E-25 |
| LAMA5     | 1.241642286  | 4.20E-25 |
| HIST1H1D  | -1.437073495 | 5.60E-25 |
| IL7R      | 1.702039903  | 9.40E-25 |
| GPR160    | -1.162013901 | 1.10E-24 |
| TCP11L2   | 1.417004219  | 1.90E-24 |
| G0S2      | 1.891095764  | 3.00E-24 |
| RBL1      | -0.888539453 | 3.70E-24 |
| TPRG1L    | 0.851434129  | 3.80E-24 |
| HIST1H4L  | -1.688537584 | 4.10E-24 |
| IDS       | 0.905470176  | 5.30E-24 |
| COL6A1    | 1.205697439  | 5.40E-24 |
| NCAPG     | -0.979320303 | 1.30E-23 |
| TRIM2     | 1.314187602  | 1.40E-23 |
| FANCI     | -1.131195514 | 1.50E-23 |
| HSPB8     | 0.869357197  | 1.50E-23 |
| HIST1H2AD | -1.107929506 | 1.60E-23 |
| MRE11A    | -0.8373522   | 1.90E-23 |
| HIST1H4C  | -0.877121215 | 3.60E-23 |
| WDHD1     | -0.861717848 | 4.20E-23 |
| SLFN5     | 1.440729591  | 4.50E-23 |
| USP1      | -0.70332066  | 6.40E-23 |
| MFI2      | 0.906904156  | 9.10E-23 |
| PGAP3     | 0.865111667  | 9.90E-23 |
| HIST2H2AC | -0.926102055 | 1.10E-22 |
| RRM2      | -0.904556727 | 1.50E-22 |
| DCP2      | -0.933215035 | 2.00E-22 |
| TTF2      | -0.719481344 | 2.10E-22 |
| BIRC5     | -1.231425051 | 3.20E-22 |
| NUSAP1    | -1.063150224 | 3.30E-22 |
| MCM7      | -1.099418641 | 4.20E-22 |
| SH3BGRL3  | 0.727873799  | 7.50E-22 |
| ATAD2     | -1.022606359 | 8.20E-22 |
| HIST2H2AB | -0.917005776 | 1.10E-21 |
| PRPF38A   | -0.801604523 | 1.60E-21 |
| GUCA1C    | -2.890927021 | 2.00E-21 |
| SMC4      | -0.932382779 | 2.30E-21 |
| SEPW1     | 1.013831735  | 3.10E-21 |
| C18orf54  | -1.299549571 | 3.70E-21 |
| NAV1      | 1.083236136  | 3.70E-21 |

|           |              |          |
|-----------|--------------|----------|
| CYLD      | 0.705669441  | 5.20E-21 |
| MCM3      | -0.813192342 | 7.20E-21 |
| DBF4      | -0.921189742 | 9.30E-21 |
| DIAPH3    | -1.375136329 | 9.80E-21 |
| FAM234A   | 0.698121521  | 1.20E-20 |
| CERCAM    | 1.043618595  | 1.30E-20 |
| SMIM14    | 1.346816695  | 1.40E-20 |
| MRS2      | -0.853662458 | 1.70E-20 |
| PROS1     | 0.77982832   | 1.70E-20 |
| HIST1H2BJ | -1.216283731 | 2.20E-20 |
| RPN1      | -0.747043432 | 2.20E-20 |
| RAB8A     | -0.724433297 | 2.40E-20 |
| CHPF      | 1.152433479  | 2.50E-20 |
| MTBP      | -0.857587205 | 2.70E-20 |
| ORAI2     | 0.663271623  | 2.70E-20 |
| THOC7     | -1.072035386 | 3.90E-20 |
| CTSA      | 0.862968603  | 4.00E-20 |
| DNAJC9    | -0.952513963 | 4.90E-20 |
| HIST1H2AL | -1.286422461 | 5.20E-20 |
| SMYD2     | -0.728263197 | 6.00E-20 |
| HIST1H3F  | -1.356186596 | 6.30E-20 |
| RHOU      | 1.317015373  | 6.60E-20 |
| DTD1      | -0.795177515 | 7.50E-20 |
| INIP      | -0.74921063  | 1.30E-19 |
| HIST1H2BE | -1.223876222 | 1.40E-19 |
| ARNTL     | 0.989093468  | 1.50E-19 |
| KIFC1     | -1.068734503 | 1.60E-19 |
| PCNA      | -0.803861306 | 2.10E-19 |
| HIST2H4A  | -1.154331856 | 2.70E-19 |
| RNASEH2A  | -0.819292701 | 2.70E-19 |
| PLOD1     | 0.720467999  | 2.70E-19 |
| FAM214A   | 1.132063806  | 2.70E-19 |
| HIST1H2AM | -1.113484403 | 3.20E-19 |
| CACYBP    | -0.599920022 | 3.30E-19 |
| ZNF862    | 1.127434844  | 3.40E-19 |
| TMPO      | -0.996158196 | 3.70E-19 |
| KLHL28    | 0.799316558  | 3.70E-19 |
| ZMIZ1     | 1.100581312  | 4.00E-19 |
| NCAPD3    | -0.796720426 | 5.20E-19 |
| CSE1L     | -0.752745691 | 5.40E-19 |
| NIPAL3    | 1.077212866  | 5.80E-19 |
| RANBP1    | -0.755293564 | 6.10E-19 |
| NEMP2     | -0.958272287 | 7.30E-19 |
| ELOVL7    | -1.035851167 | 7.40E-19 |
| AMPD3     | 1.252763987  | 7.40E-19 |
| BLM       | -1.068554422 | 7.70E-19 |
| HIST2H3D  | -1.343721    | 8.20E-19 |
| GLO1      | -0.70938103  | 8.20E-19 |
| HIST1H2AH | -1.249304562 | 9.50E-19 |
| RCC1      | -0.871948183 | 9.60E-19 |
| GPSM2     | -0.785768644 | 1.10E-18 |
| DUSP13    | 2.727982606  | 1.10E-18 |
| CENPU     | -1.112558474 | 1.20E-18 |
| C1orf186  | -0.959364637 | 1.20E-18 |
| NANOS1    | 1.419128275  | 1.30E-18 |

|           |              |          |
|-----------|--------------|----------|
| DCBLD1    | 1.341786338  | 1.40E-18 |
| SCG5      | 2.028257124  | 1.60E-18 |
| DACT1     | 2.083126589  | 1.80E-18 |
| HIST1H2BG | -1.180395609 | 1.90E-18 |
| EVA1B     | 0.956871389  | 2.30E-18 |
| DCLRE1A   | -0.772038165 | 2.50E-18 |
| SREK1IP1  | -0.769164763 | 2.50E-18 |
| DSCC1     | -0.928003154 | 2.80E-18 |
| CNTNAP3   | 1.505085986  | 3.20E-18 |
| HIST1H2BK | -0.869719566 | 3.40E-18 |
| HIST1H3J  | -1.476849149 | 3.50E-18 |
| HIST1H2AJ | -1.216963205 | 3.50E-18 |
| ADGRF4    | 1.621272911  | 3.70E-18 |
| CLN8      | 0.677172573  | 3.80E-18 |
| UNG       | -0.727321507 | 5.60E-18 |
| MCM4      | -0.869830802 | 6.00E-18 |
| NOB1      | -0.642971189 | 6.20E-18 |
| GATSL2    | 0.971301934  | 6.20E-18 |
| FAM111B   | -1.11738203  | 6.80E-18 |
| CENPI     | -1.011242017 | 7.10E-18 |
| HIST2H2BE | -0.966175549 | 1.20E-17 |
| G3BP1     | -0.890376482 | 1.20E-17 |
| KIAA1147  | -0.683917443 | 1.20E-17 |
| GPC1      | 0.929007506  | 1.20E-17 |
| CHAF1A    | -0.785336658 | 1.30E-17 |
| HSPG2     | 0.839002818  | 1.50E-17 |
| HIST1H4B  | -0.836610191 | 1.60E-17 |
| MRPL3     | -0.617734202 | 1.70E-17 |
| TMEM178B  | -1.28095708  | 1.90E-17 |
| MCM5      | -0.774536653 | 1.90E-17 |
| HIST2H2BF | -1.173416212 | 2.00E-17 |
| RFC3      | -0.868657118 | 2.00E-17 |
| BLCAP     | 0.622046809  | 2.30E-17 |
| MOSPD1    | 0.830937591  | 2.30E-17 |
| HIST1H1B  | -1.250288746 | 2.40E-17 |
| MTFR1     | -0.642215236 | 2.70E-17 |
| HMGB3     | -0.63031227  | 2.70E-17 |
| S100A4    | 1.739113231  | 2.70E-17 |
| RNF128    | 0.735757108  | 2.80E-17 |
| KATNAL1   | -1.02397931  | 3.30E-17 |
| BTBD11    | 0.945684859  | 3.40E-17 |
| SAAL1     | -0.819053584 | 3.80E-17 |
| MLPH      | 1.112325765  | 4.10E-17 |
| CLEC4E    | -1.984753703 | 4.20E-17 |
| HIST1H2BB | -1.357010287 | 4.20E-17 |
| MAPRE3    | 1.165162142  | 4.60E-17 |
| HIST1H2BO | -1.207666108 | 4.80E-17 |
| ECT2      | -0.860259654 | 5.10E-17 |
| CENPQ     | -1.03360922  | 6.10E-17 |
| RAD51AP1  | -1.157635913 | 6.30E-17 |
| LRRN4     | -1.594872168 | 8.00E-17 |
| EXO1      | -1.077233001 | 8.40E-17 |
| TIPIN     | -0.819237592 | 8.70E-17 |
| ADAMTS3   | -1.232152891 | 8.80E-17 |
| TAF4B     | -0.984781643 | 8.80E-17 |

|           |              |          |
|-----------|--------------|----------|
| GFPT2     | 2.227100243  | 9.30E-17 |
| PARP1     | -0.641384121 | 1.10E-16 |
| COL6A2    | 0.885294784  | 1.10E-16 |
| HIST1H2BN | -0.786367923 | 1.20E-16 |
| SIPA1L3   | -0.760889242 | 1.20E-16 |
| HPGD      | 2.112576016  | 1.30E-16 |
| CASP3     | -0.789867411 | 1.40E-16 |
| CDK2      | -0.797926291 | 1.50E-16 |
| HIST1H3C  | -1.104269353 | 1.60E-16 |
| BRWD3     | 0.739931063  | 1.60E-16 |
| MMP24-AS1 | 1.012741944  | 1.90E-16 |
| BFSP1     | 1.716373426  | 1.90E-16 |
| E2F1      | -0.990214583 | 2.00E-16 |
| INSIG1    | -0.912402052 | 2.00E-16 |
| RHBDF1    | 0.724823661  | 2.30E-16 |
| HELLS     | -0.936666853 | 2.50E-16 |
| GGH       | -0.669578304 | 2.50E-16 |
| FAM72D    | -1.279190698 | 2.80E-16 |
| PLSCR4    | 1.726402078  | 3.00E-16 |
| PKMYT1    | -1.170633974 | 3.50E-16 |
| SET       | -0.511388928 | 3.60E-16 |
| THRB      | -1.008442567 | 4.10E-16 |
| PRIM1     | -1.107950824 | 4.50E-16 |
| DCDC2     | -1.1704573   | 4.90E-16 |
| SH3BP5    | 0.869502676  | 6.00E-16 |
| CD68      | 1.107667091  | 6.10E-16 |
| TPK1      | -1.240572893 | 6.20E-16 |
| DEK       | -0.705283323 | 7.60E-16 |
| FANCA     | -0.926030281 | 7.90E-16 |
| DIRAS2    | 2.071056894  | 8.50E-16 |
| HIST1H2AE | -1.05765035  | 9.30E-16 |
| RAB13     | 0.737691871  | 1.00E-15 |
| NNMT      | -1.016542371 | 1.10E-15 |
| GAREM     | 0.867393761  | 1.10E-15 |
| PM20D2    | -0.875684408 | 1.20E-15 |
| PDE12     | -0.829846284 | 1.20E-15 |
| HIST1H2BF | -1.04053329  | 1.30E-15 |
| DSG2      | -0.945327164 | 1.30E-15 |
| PTTG1     | -0.757030645 | 1.30E-15 |
| SUV39H2   | -0.704777351 | 1.30E-15 |
| TMEM59    | 0.883551421  | 1.30E-15 |
| HIST1H4A  | -0.753586365 | 1.50E-15 |
| CDKN1A    | 1.119582816  | 1.80E-15 |
| TNFRSF1A  | 0.615287007  | 1.90E-15 |
| ABCA7     | 1.337359746  | 1.90E-15 |
| KIF4A     | -1.010257211 | 2.00E-15 |
| TSC22D1   | 0.814261326  | 2.00E-15 |
| AKR1C3    | 1.756882035  | 2.20E-15 |
| SIDT2     | 0.943641623  | 2.30E-15 |
| COL4A2    | -1.235413903 | 2.60E-15 |
| HIST1H2AG | -1.0285196   | 3.40E-15 |
| BUB1      | -0.907007607 | 3.40E-15 |
| TMEM185B  | -0.735411458 | 3.60E-15 |
| GXYLT2    | 1.240772612  | 3.60E-15 |
| CTIF      | 1.268636945  | 3.60E-15 |

|           |              |          |
|-----------|--------------|----------|
| EVI5L     | 1.290343694  | 3.60E-15 |
| ATAD5     | -0.755993014 | 3.70E-15 |
| CLSPN     | -1.056809333 | 4.00E-15 |
| NCAPD2    | -0.688356491 | 4.30E-15 |
| CDCA7     | -0.983801354 | 4.40E-15 |
| IL11      | 1.981583895  | 5.20E-15 |
| DEPDC1B   | -1.12841227  | 5.30E-15 |
| THRA      | 1.034421464  | 5.70E-15 |
| RMI2      | -1.021740756 | 6.20E-15 |
| NCAPG2    | -0.776625613 | 6.80E-15 |
| HIST1H3B  | -1.105386879 | 7.20E-15 |
| CDC45     | -0.976471427 | 7.60E-15 |
| LLGL2     | 1.164520723  | 7.60E-15 |
| QSOX1     | 0.749704086  | 7.70E-15 |
| CWC27     | -0.641436105 | 7.80E-15 |
| U2SURP    | -0.536689568 | 8.40E-15 |
| SLC22A4   | 1.220030387  | 8.90E-15 |
| SRPX2     | 1.986816243  | 9.20E-15 |
| RBMX      | -0.545935266 | 1.00E-14 |
| HIST1H2BL | -1.145025206 | 1.10E-14 |
| HIST1H3I  | -1.294015198 | 1.20E-14 |
| FAM111A   | -0.770029468 | 1.70E-14 |
| PNRC1     | 0.979812739  | 1.70E-14 |
| ANP32E    | -0.706993933 | 1.90E-14 |
| HES1      | 0.918629796  | 1.90E-14 |
| DUT       | -0.645313821 | 2.10E-14 |
| SYNJ2     | 0.993207311  | 2.10E-14 |
| TNFRSF21  | 1.191762324  | 2.10E-14 |
| KIF15     | -1.033695963 | 2.20E-14 |
| NELFCD    | -0.742551121 | 2.60E-14 |
| FAM3C     | 1.027411124  | 2.80E-14 |
| CEP126    | 0.979079332  | 2.90E-14 |
| SEC14L2   | 0.751156684  | 3.10E-14 |
| EPHX1     | 0.777255976  | 3.30E-14 |
| PPL       | 1.379823929  | 3.30E-14 |
| MN1       | 1.578981434  | 3.30E-14 |
| NKIRAS2   | 0.639904278  | 3.80E-14 |
| FKBP5     | -1.045166325 | 4.00E-14 |
| PLXND1    | 0.826055936  | 4.10E-14 |
| SP4       | -0.85765063  | 4.20E-14 |
| CENPW     | -1.077782567 | 5.10E-14 |
| CDCA5     | -0.945472808 | 5.50E-14 |
| SYTL3     | -1.073352908 | 5.70E-14 |
| PITPNM2   | 0.925849845  | 5.80E-14 |
| ZCCHC24   | 1.053032941  | 5.80E-14 |
| GOLT1A    | 1.489887294  | 6.00E-14 |
| PPP1R9A   | -0.685211409 | 6.10E-14 |
| MANBA     | 0.986530602  | 6.80E-14 |
| KRT81     | 2.452931218  | 7.50E-14 |
| CACFD1    | 0.892206518  | 8.00E-14 |
| TNPO3     | -0.684981672 | 9.10E-14 |
| MACROD2   | -1.150600219 | 9.60E-14 |
| SSB       | -1.029976287 | 9.90E-14 |
| RAB7B     | 1.599592873  | 9.90E-14 |
| KCMF1     | -0.634596079 | 1.00E-13 |

|          |              |          |
|----------|--------------|----------|
| KLHL23   | -0.62775173  | 1.10E-13 |
| MSR1     | 1.441281476  | 1.10E-13 |
| ABCF1    | -0.629392373 | 1.30E-13 |
| LYST     | 0.876145312  | 1.60E-13 |
| UMPS     | -0.58964327  | 1.70E-13 |
| PLD3     | 0.769983107  | 1.70E-13 |
| ABCC3    | 1.136170045  | 1.70E-13 |
| STAT1    | -1.262144595 | 2.10E-13 |
| OSTM1    | -0.880866364 | 2.10E-13 |
| SEC24B   | -0.630060053 | 2.10E-13 |
| DDR1     | 1.364789015  | 2.10E-13 |
| PPP1R14C | -1.257490029 | 2.20E-13 |
| PCDHGB7  | 1.44645087   | 2.30E-13 |
| ETFB     | 0.670714944  | 2.40E-13 |
| EDEM3    | 0.542519513  | 2.70E-13 |
| RPE      | -0.587640337 | 2.80E-13 |
| STIL     | -0.900984462 | 2.90E-13 |
| CCNE2    | -1.071207306 | 3.00E-13 |
| MCM8     | -0.686664539 | 3.00E-13 |
| PRSS23   | 1.504188105  | 3.00E-13 |
| ADGRB2   | 1.681775418  | 3.00E-13 |
| CENPA    | -0.989178023 | 3.20E-13 |
| PINK1    | 0.874279794  | 3.20E-13 |
| KIF20B   | -0.793294902 | 4.00E-13 |
| ZWINT    | -0.937814766 | 4.30E-13 |
| SFXN2    | -0.809165059 | 4.50E-13 |
| ST3GAL5  | 1.443605962  | 4.60E-13 |
| H2AFX    | -0.82052803  | 4.70E-13 |
| ADAM12   | 1.285985845  | 5.80E-13 |
| CENPH    | -0.853974266 | 5.90E-13 |
| PKDCC    | 0.924621497  | 5.90E-13 |
| NEFL     | -1.06182384  | 6.50E-13 |
| ENDOD1   | 1.063966869  | 6.80E-13 |
| TNC      | 2.04580145   | 7.20E-13 |
| E2F8     | -1.331204098 | 7.60E-13 |
| WFDC3    | 1.286474512  | 8.50E-13 |
| CSRP2    | -1.064285481 | 1.00E-12 |
| FANCD2   | -0.874152486 | 1.00E-12 |
| KIAA1524 | -0.849983991 | 1.00E-12 |
| H2BFS    | -0.732498549 | 1.00E-12 |
| TICRR    | -0.722251485 | 1.20E-12 |
| SPAG7    | 0.654414064  | 1.20E-12 |
| SAPCD2   | -0.848715089 | 1.30E-12 |
| CEP78    | -0.614353399 | 1.30E-12 |
| RPA1     | -0.612722307 | 1.30E-12 |
| EBNA1BP2 | -0.605518148 | 1.30E-12 |
| GRIP1    | 0.887795335  | 1.40E-12 |
| CDK1     | -0.947158491 | 1.50E-12 |
| CLOCK    | -0.668144952 | 1.50E-12 |
| GAN      | -0.641838496 | 1.70E-12 |
| IRGQ     | 0.556292374  | 1.70E-12 |
| AP3S2    | 0.58643899   | 1.70E-12 |
| CRAT     | 0.748131485  | 1.70E-12 |
| HIST1H3D | -0.988562982 | 1.80E-12 |
| TGIF1    | -0.668220143 | 1.80E-12 |



|          |              |          |
|----------|--------------|----------|
| SLC47A2  | 1.970822267  | 2.00E-12 |
| CSTF2    | -0.581941118 | 2.30E-12 |
| CTSD     | 0.77296868   | 2.40E-12 |
| SKA3     | -0.96309783  | 2.60E-12 |
| ADAMTS10 | 1.868257319  | 2.60E-12 |
| DNA2     | -0.743363767 | 2.90E-12 |
| MMGT1    | -0.858158466 | 3.00E-12 |
| TCN2     | 1.219989853  | 3.50E-12 |
| FUBP1    | -0.64837773  | 3.60E-12 |
| CDC23    | -0.576679457 | 4.10E-12 |
| PBX1     | 0.988021414  | 4.10E-12 |
| LIPH     | 1.404703228  | 4.10E-12 |
| FAM149A  | -0.976846967 | 4.20E-12 |
| RAPGEF2  | 0.578921016  | 4.30E-12 |
| ZMAT3    | 0.83303517   | 4.70E-12 |
| DHFR     | -1.004386519 | 5.10E-12 |
| MSRB2    | 0.764640335  | 5.20E-12 |
| GATS     | 0.973056998  | 5.60E-12 |
| ADAP2    | -0.840587711 | 5.80E-12 |
| CYB561D1 | 0.746950393  | 6.90E-12 |
| ANTXR2   | 0.868665565  | 7.20E-12 |
| HIST1H1E | -0.931168677 | 7.50E-12 |
| KIF14    | -0.855124022 | 7.60E-12 |
| SPC24    | -0.66743113  | 8.00E-12 |
| HIST2H3A | -1.089496333 | 8.40E-12 |
| HIST2H3C | -1.089496333 | 8.40E-12 |
| BRCA1    | -0.761790911 | 9.20E-12 |
| CENPF    | -0.860115178 | 9.30E-12 |
| SERP1    | 0.542888022  | 9.40E-12 |
| AGPAT3   | -0.670270031 | 9.60E-12 |
| TK1      | -0.857689603 | 1.10E-11 |
| UBE2T    | -0.808211583 | 1.10E-11 |
| PTPN3    | -0.802292634 | 1.10E-11 |
| HNF1B    | -1.010991595 | 1.20E-11 |
| SPARC    | 1.475231321  | 1.20E-11 |
| UHRF1    | -0.89711204  | 1.40E-11 |
| DNAJB9   | 0.995813711  | 1.40E-11 |
| N4BP3    | -1.669484177 | 1.50E-11 |
